# Supplementary material for: The Actin-Disassembly Protein Glia Maturation Factor γ Enhances Actin Remodeling and B Cell Antigen Receptor Signaling at the Immune Synapse
Source: PubMed Central journal article supplement (PMC8318000; doi:10.3389/fcell.2021.647063), 2021-07-09
Supplement: Data_Sheet_1.pdf [file Data_Sheet_1.pdf]

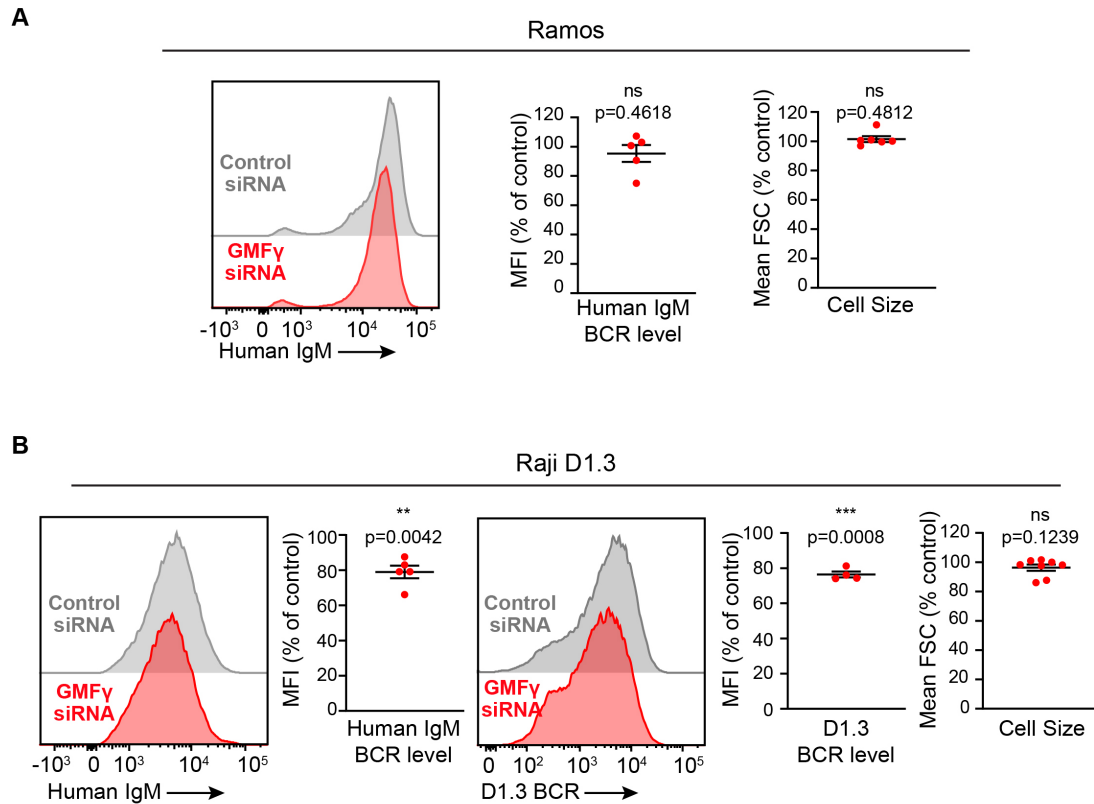

**SUPPLEMENTARY FIGURE 1 | Effects of GMF-gamma depletion on BCR cell surface levels and cell size.**

Ramos (**A**) or Raji D1.3 B cells (**B**) were transfected with control non-targeting siRNA or GMF $\gamma$  siRNA and then cultured for 48-72 h. The cells were stained with antibodies to human IgM to detect the endogenous BCR or with anti-mouse IgM to detect the D1.3 BCR on Raji D1.3 B cells. Flow cytometry was used to quantify cell surface IgM levels as well as forward scatter, a measure of cell size. Histograms from representative experiments are shown. The graphs show the cell surface BCR levels (mean fluorescence intensity) or cell size (mean forward scatter) for the GMF $\gamma$  siRNA-transfected cells, expressed as a percent of that for the control siRNA-transfected cells in the same experiment. Each dot is an independent experiment. Paired t-tests were used to calculate p-values.

## MOVIE CAPTIONS

**Movie 1 | Peripheral actin dynamics in control siRNA-transfected B cells plated on immobilized anti-IgM.** Raji D1.3 B cells that had been co-transfected with F-tractin-GFP cDNA and control siRNA were added to anti-IgM-coated coverslips. After allowing the cells to spread for 5 min, the cell-substrate contact site was imaged using TIRF microscopy. Images were then acquired every 2 s for 15 min. Video playback is 60 frames per second (120X real time). See **Figure 4**.

**Movie 2 | Peripheral actin dynamics in GMF $\gamma$  siRNA-transfected B cells plated on immobilized anti-IgM.** Raji D1.3 B cells that had been co-transfected with F-tractin-GFP cDNA and GMF $\gamma$  siRNA were added to anti-IgM-coated coverslips. After allowing the cells to spread for 5 min, the cell-substrate contact site was imaged using TIRF microscopy. Images were then acquired every 2 s for 15 min. Video playback is 60 frames per second (120X real time). See **Figure 4**.
